1 ***The swim-up technique separates bovine sperm by metabolic rates, motility and tail length***

2 Veronika Magdanz<sup>1\*</sup>, Sergii Boryshpolets<sup>2</sup>, Clara Ridzewski<sup>1</sup>, Barbara Eckel<sup>1</sup>, Klaus  
3 Reinhardt<sup>1</sup>

4

5 <sup>1</sup> Chair of Applied Zoology, TU Dresden

6 Zellescher Weg 20,

7 01217 Dresden, Germany

8

9 <sup>2</sup> University of South Bohemia in České Budějovice

10 Faculty of Fisheries and Protection of Waters

11 South Bohemian Research Center of Aquaculture and Biodiversity of Hydrosensors

12 Zátiší 728/II

13 389 25 Vodňany, Czech Republic

14

15 \*veronika.magdanz@tu-dresden.de

16

17 **Abstract**

18

19 Swim-up is a sperm purification method that is being used daily in andrology labs around the  
20 world as a simple step for *in vitro* sperm selection. This method accumulates the most motile  
21 sperm in the upper fraction and leaves sperm with low or no motility in the lower fraction but  
22 the underlying reasons are not fully understood. In this article, we compare metabolic rate,  
23 motility and sperm tail length of bovine sperm cells of the upper and lower fraction. The  
24 metabolic assay platform reveals oxygen consumption rates and extracellular acidification rates  
25 simultaneously and thereby delivers the metabolic rates in real time. Our study confirms the  
26 upper fraction of bull sperm has improved motility compared to the cells in the lower fraction  
27 and shows higher metabolic rates. This pattern was consistent across media of two different  
28 levels of viscosity. Sperm with longer flagella are selected in the upper fraction. We conclude  
29 that the motility-based separation of the swim-up technique is based on metabolic differences.  
30 Metabolic assays could serve as additional or alternative, label-free method to evaluate sperm  
31 quality, which is likely particularly useful in cases of asthenozoospermia and teratospermia.  
32 Furthermore, metabolic measurements of sperm cells can reveal differences in metabolic  
33 pathways in different environments.

1

## 2 **Keywords**

3 swim-up, bovine sperm, metabolism, sperm selection, sperm quality

## 4 ***Introduction***

5 Infertility affects 10-15% of couples worldwide, and about 15 % of these cases remain  
6 unexplained<sup>1,2</sup>. Among various other processes, successful fertilization requires the migration  
7 of sperm through the female reproductive tract, a process hard to reconstruct *in vitro*. Except  
8 for sperm morphology, current *in vitro* sperm selection assays in assisted reproduction are  
9 mostly based on motility assays, maturity (based on sperm binding to hyaluronic acid), zona  
10 pellucida binding, assessment of acrosome reaction, or mucus penetration<sup>3,4</sup> - all processes that  
11 require energy.

12 Sperm cells obtain their energy through two main pathways, oxidative phosphorylation (ATP  
13 production through the electron transport chain of the mitochondria) or glycolysis (ATP  
14 production in the cytosol by breakdown of sugars). The degree to which these metabolic  
15 pathways are employed in sperm is species-specific and either oxidative phosphorylation or  
16 glycolysis can be more pronounced under certain conditions<sup>5</sup>. For instance, it is known that in  
17 murine sperm, glycolysis is the dominant pathway, while in bovine sperm, oxidative  
18 phosphorylation is preferred<sup>5-8</sup>. In human sperm, both pathways are essential for energy  
19 production. However, glycolysis is sufficient to maintain motility if glucose is present in the  
20 medium<sup>9,10</sup>. It is also predicted that sperm can switch between pathways depending on the  
21 conditions in the female reproductive tract, substrate and oxygen concentrations<sup>8,11</sup>.

22 As most of the sperm's energy goes towards motility, it is commonly used as an indicator for  
23 predicting fertilization success<sup>8,12,13</sup>. In birds and external fertilizers, where higher sperm  
24 motility is beneficial under sperm competition, selection for higher energetic capacity in sperm  
25 was suggested<sup>14,15</sup>.

26 Swim-up is a simple, clinical routine method to separate motile from non-motile spermatozoa  
27 *in vitro*<sup>16</sup> whereby sperm are allowed to swim upwards through an overlaid medium. Sperm  
28 that do not migrate into the upper medium form the lower fraction. Compared to these sperm,  
29 sperm that swim up into the upper medium (upper fraction) displayed increased motility, higher  
30 average velocity, higher percentage of normal morphology and generated improved fertilization

1 rates in vitro<sup>17–22</sup>. Therefore, somehow, the swim-up method captures the sperm fraction that  
2 also masters the complexity of sperm migration and transport through the reproductive tract to  
3 the fertilization site<sup>21</sup>. It is clear that these sperm should be the ones that are enriched to be used  
4 in artificial reproduction technologies in humans. However, the underlying mechanism seems  
5 yet unknown. This has several important consequences. First, it is not clear to what extent  
6 positively selected swim-up sperm with proven increased fertilisation rates in vitro will  
7 represent successful sperm migration in the female reproductive tract in vivo. For instance, the  
8 swim-up medium is less viscous than the female reproductive tract mucus. During their  
9 migration through the reproductive tract, sperm cells encounter a wide range of viscosities, and  
10 high viscosity is thought to act as selective agent/barrier by the female. It is also known that the  
11 flagellar beating pattern of sperm is altered in high viscosities.<sup>23</sup> We take this as an incentive to  
12 investigate the metabolism of the different sperm swim-up fractions in a medium with viscosity  
13 equivalent to the female reproductive tract mucus<sup>24,25</sup>. Second, currently, little seems known  
14 whether motility, or swim-up, differences are based on differences in metabolic rate or  
15 metabolic pathways. This seems important because under oxidative, but not glycolytic sperm  
16 metabolism, sperm damage by oxygen radicals can be expected<sup>26</sup>. This notion may be more  
17 important in non-human vertebrates because females of non-human vertebrates can store sperm  
18 for days to months, even years<sup>27</sup> and therefore it is not clear how the short-term success  
19 identified by swim-up will translate into fertilisation success of sperm that have been stored.  
20 For example, if swim-up success would be caused by a high rate of oxidative sperm metabolism,  
21 it is conceivable that this high short-term oxidative expenditure may translate into oxidative  
22 damage in the mid- or long-term.

23 Thus, both, clinical analysis as well as sperm selection in assisted reproduction technologies in  
24 humans and animals would benefit from information about the underlying metabolic pathway  
25 of the swim-up fractions. Here we compare the metabolic activity of sperm in swim-up fractions  
26 in 12 bulls from three genetically different breeds. We perform metabolic measurements before  
27 and after swim-up procedure and compare metabolic rates from oxidative phosphorylation and  
28 glycolysis of the upper and lower fractions and analyse whether sperm metabolism is repeatable  
29 across two levels of viscosity and so predicts motility through environments of different  
30 viscosity.

31

## 1 **Results**

### 2 *Metabolic rates of bovine sperm after swim-up*

3 The rate of oxidative phosphorylation and glycolytic rate are obtained by simultaneously  
4 measuring the oxygen consumption rate (OCR) and extracellular acidification rate (ECAR) in  
5 an extracellular flux analyzer. The oxygen consumption rate is a direct measure of the  
6 mitochondrial electron transport rate and thereby stands as an equivalent for oxidative  
7 phosphorylation, during which oxygen is consumed by the cells. The extracellular acidification  
8 derives from the lactic acid formed during glycolysis. For a previous application in sperm see  
9 Tourmente et al.<sup>6</sup>. The basal rates for OCR and ECAR of the upper, lower and before swim-up  
10 fractions were measured for 22 minutes comprising four measurement points each consisting  
11 of 15 data points (see Figure 1).

12 The upper fraction showed higher OCR across the three bulls from three different breeds  
13 (Holstein, Fleckvieh, Angus) (Figure 1, yellow data points). The average OCR of upper fraction  
14 sperm was up to an order of magnitude higher than in the “before swim-up” and lower fraction  
15 sperm population (Figure 1).

16 Generally, the low ECAR values of all sperm fractions indicate that bull sperm perform little  
17 glycolysis. The three bulls differed in the temporal change in glycolytic activity (Figure 1, lower  
18 panel). The upper fraction showed higher ECAR activity compared to the “before swim-up”  
19 sperm except in the Holstein individual. The basal ECAR was consistently higher in the upper  
20 fractions compared to the lower swim-up fractions (blue data sets, Figure 1). Additionally, the  
21 ratio between upper and lower fraction OCR and ECAR is different in different individuals.

22

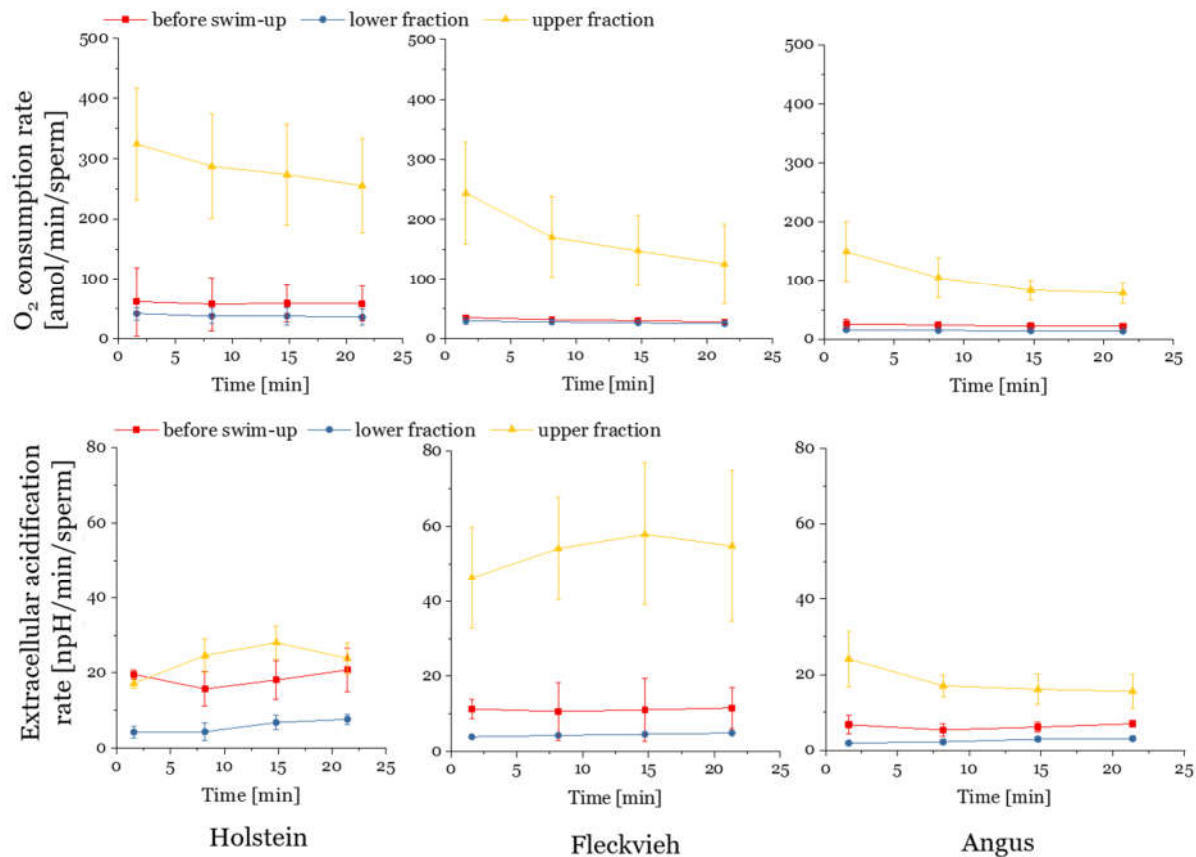

1  
 2 *Figure 1: Basal sperm metabolic rates over time in three representative bulls belonging to different breeds.*  
 3 *Oxygen consumption rates (OCR) (top) and extracellular acidification rates (bottom) of bull sperm that did not*  
 4 *undergo swim-up (before swim-up), upper and lower fractions after swim-up procedure of three bulls of different*  
 5 *cattle breeds. Each data point is obtained from a mean value from 3 wells and the data were normalized to the*  
 6 *number of cells in each well.*

7 This indicates that the swim-up selects sperm with higher metabolic rates. The fact that the  
 8 upper fractions display higher OCR and ECAR was not caused by larger sperm numbers in the  
 9 lower fraction, because all OCR and ECAR values were normalized to the sperm number per  
 10 well. The density of sperm does not influence their metabolic activity.<sup>28</sup> On average, the before  
 11 swim-up fraction contained  $4 \times 10^6$  cells/mL, the lower fraction  $2 \times 10^7$  cells /mL and the upper  
 12 fraction  $8 \times 10^5$  cells/mL, which means that 23% of cells from the initial sample (before swim-  
 13 up) migrate to the upper fraction during the swim-up. A low proportion of motile sperm  
 14 remaining in the lower fraction may cause the OCR in the lower fraction to show lower average  
 15 values. We tested for this idea in sperm samples from three bulls by normalizing OCR and  
 16 ECAR to the number of motile sperm in each fraction (Figure S2) even though such  
 17 normalization has the caveat that metabolically active but non-motile sperm are excluded.

1 Motility was measured immediately before the metabolic measurements (see Methods). The  
2 swim-up accumulates the motile sperm in the upper fraction (motility values of 45-65% in the  
3 upper fraction and the non-motile sperm (motility 12.5-32% in the lower fraction (Figure S2a).  
4 Standardising OCR values to the number of motile cells shows the differences between “before  
5 swim-up” and “upper fractions” are now diminished in two individuals and retained in one  
6 (Figure S2b). Therefore, the OCR separation by swim-up is partly but not exclusively related  
7 to motility.

8 Normalizing ECAR in the same way shows a very large range of ECAR per motile sperm (20-  
9 160 npH/min/motile sperm) in the Holstein bull before swim-up (Figure S2b, right graph).  
10 ECAR is reduced in the upper and lower fraction (40-74 npH/min/motile sperm and 10-32  
11 npH/min/motile sperm, respectively). In the Fleckvieh bull, the upper fraction shows by far  
12 higher values than the before swim-up and lower fraction. In the Angus bull, all fractions  
13 display relatively low ECAR values. This illustrates that the swim-up does not generally select  
14 sperm with higher glycolytic rate (only in Fleckvieh this was the case).

15 Plotting the average basal OCR over the average basal ECAR (see Figure S1) results in the  
16 characterisation of the metabolic phenotype, or energetic potential, i.e. the ability of the cells  
17 to change the metabolic pathway and respond to changes in the energy demand. Analysing the  
18 metabolic phenotype of the upper and lower fraction (Figure S1) suggests that the upper fraction  
19 sperm had more energetic potential, as indicated by the upper fraction moving more to the upper  
20 right.

21 Regardless of the actual values, the ratio of OCR/ECAR can indicate a preference of  
22 metabolism for either oxidative phosphorylation or glycolysis<sup>29</sup>. The average OCR/ECAR ratio  
23 values of the different fractions are above one, which indicates that bull sperm perform a much  
24 higher amount of oxphos compared to glycolysis (Figure S3). The upper fractions show a  
25 OCR/ECAR ratio mean value more towards glycolysis than the “before swim-up” and lower  
26 fractions (Figure S3) ( $p < 0.0001$ , see supporting information), indicating a shift in metabolic  
27 pathway usage occurs. This difference in OCR/ECAR ratio was consistent across both levels  
28 of viscosity ( $p < 0.043$ , see supporting information). The OCR/ECAR ratio does not represent  
29 overall metabolic activity, but rather shows a shift in metabolic pathway usage.

30 *The influence of medium viscosity*

1 So far, we have analysed metabolic parameters in standard medium. A minimum requirement  
 2 that the standard medium reflects differences in sperm environments, such as different  
 3 viscosities, is that swim-up separates fractions that are consistent in their performance across  
 4 different viscosities. We measured the metabolic rates of the different fractions in two different  
 5 viscosities (see setup Figure 2a). Adding 1% methyl cellulose to a conventional assay medium  
 6 results in viscosity values several orders of magnitude higher (at shear rate  $5 \text{ s}^{-1}$ )<sup>24,25</sup>. This  
 7 viscosity mimics that of fluids of the reproductive tract, reported to be 0.1-1.0 Pa s<sup>30</sup> and has  
 8 previously been used to study sperm motion in viscous environment similar to the *in vivo*  
 9 conditions<sup>31-34</sup>.

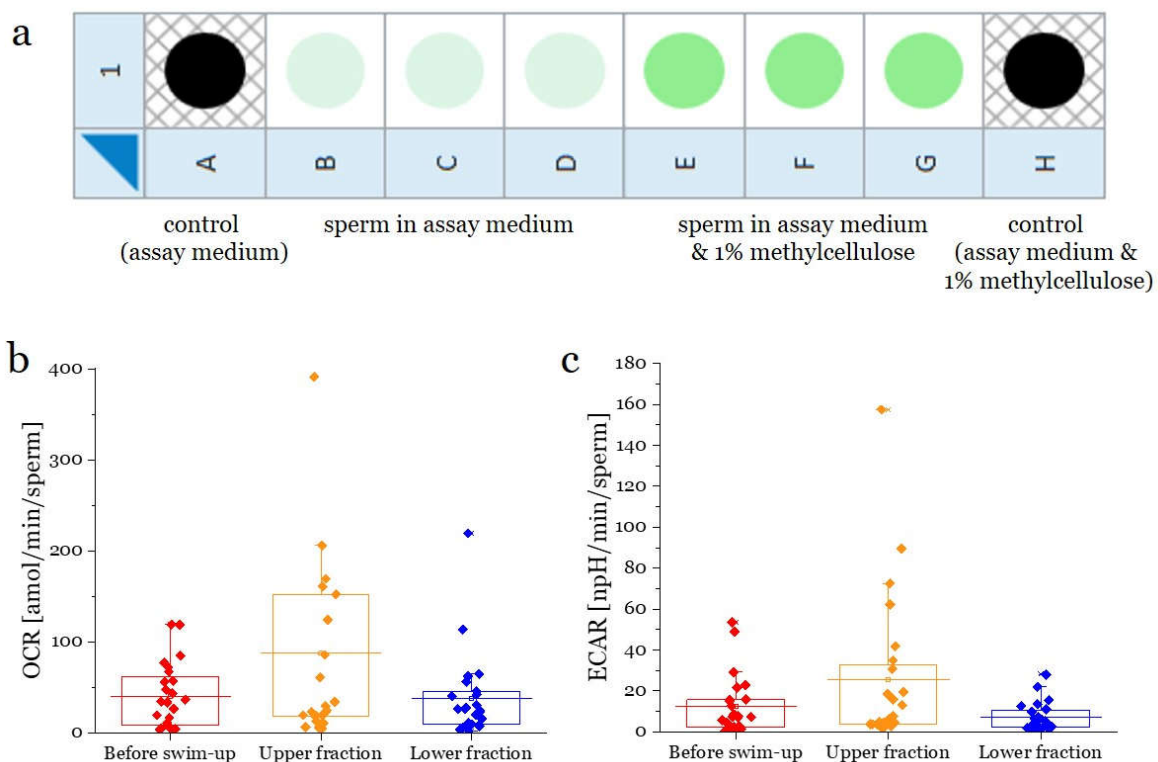

10

11 *Figure 2: After swim-up in low viscosity medium (sperm medium SP-TALP), oxygen consumption rate (OCR) is*  
 12 *compared between low viscosity medium (Assay Medium) and high viscosity medium (Assay medium supplemented*  
 13 *with 1% MC). a) Shows the sample distribution in the 8 well plate. This triple-well measurement was performed*  
 14 *on each fraction (upper, lower and before swim-up) and two control wells with the two levels of viscosity were*  
 15 *used as background level. b) shows the oxygen consumption rate (OCR) and c) shows the extracellular*  
 16 *acidification rate (ECAR) for the sperm that did not perform swim-up (before swim-up), the upper and lower swim-*  
 17 *up fractions of 12 bulls of different breeds (Holstein, Fleckvieh, Angus). The horizontal lines across the boxes*  
 18 *displays the mean values.*

19 Across both viscosities, the lower fractions displayed the lowest OCR (Figure 2b) and sperm  
 20 with higher OCR accumulated in the upper fractions. Note that the results in standard medium



1 confirm our earlier measurements. There were no differences in sperm OCR rates between low  
2 and high viscosity (see Figure S6 in supporting information). This indicates that swim-up  
3 selects sperm in the upper fraction that display a higher respiratory activity and therefore have  
4 the ability to penetrate fluids of different levels of viscosity. ECAR showed similar values as  
5 OCR (Figure 2c), indicating that rates of both pathways are increased in the upper fractions,  
6 and therefore, overall metabolic rate.

7 The difference in energetic phenotype between upper and lower fraction was also maintained  
8 through both levels of viscosity (Figure S1), as was the difference in OCR/ECAR ratio  
9 ( $p < 0.043$ , see supporting information Figure S3).

10

11 *Swim-up separates sperm into cohorts of high and low ATP production by oxphos*

12 A crucial question is to what degree metabolic differences translate into differences in ATP  
13 production. Inhibiting the electron transport chain with Oligomycin A allows a calculation of  
14 ATP production rate by oxidative phosphorylation (Figure 3a). Lower fractions (Figure 3b)  
15 produced less ATP by oxidative phosphorylation than the upper fractions ( $p = 0.0001$ , see Table  
16 4 in SI). The upper fractions also had higher values than the initial sperm sample (before swim-  
17 up). ATP production was similar in higher compared to lower viscosity for all fractions (Figure  
18 S7 in supporting information).

19 These results indicate that the swim-up separates sperm into fractions of higher and lower ATP  
20 production, but that swim-up does not reflect a precise measure of ATP production.



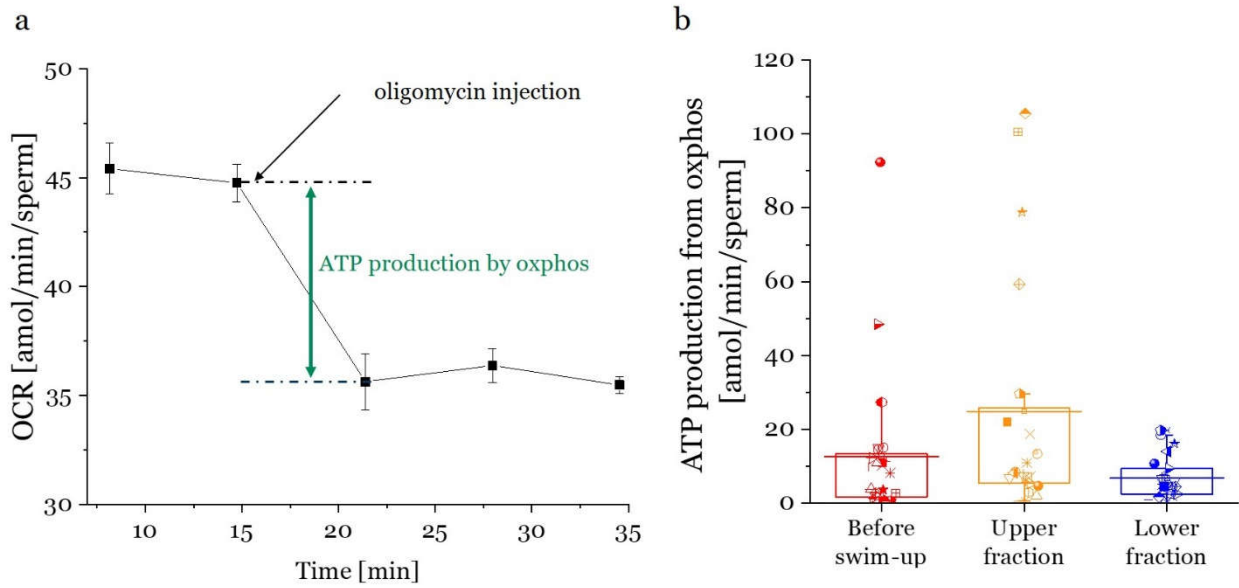

1

2 *Figure 3: ATP production by oxidative phosphorylation of different swim-up fractions. a) ATP production from*  
3 *oxphos is calculated as the difference between basal OCR rate and OCR rate after oligomycin injection. b)*  
4 *Average ATP production due to oxphos of unselected sperm (before-swim-up), upper and lower swim-up fractions.*  
5 *Each box contains data from 12 bulls. Horizontal lines through each box are the mean values.*

6 Next, we looked at the current ATP content of upper and lower fraction sperm, determined in  
7 11 bulls using a luciferase-based luminescence kit (Figure 4). The bulls showed lower total  
8 ATP content in their upper fractions compared to the before swim-up sperm and the lower  
9 fraction ( $p=0.01$ , see Table 5 in SI). That increased metabolic rates in the upper fraction (Figure  
10 1 and 2) were associated with lower total ATP content (Figure 4) suggests that upper fractions  
11 show increased ATP expenditure, perhaps caused by the metabolic activity during swim-up.

12

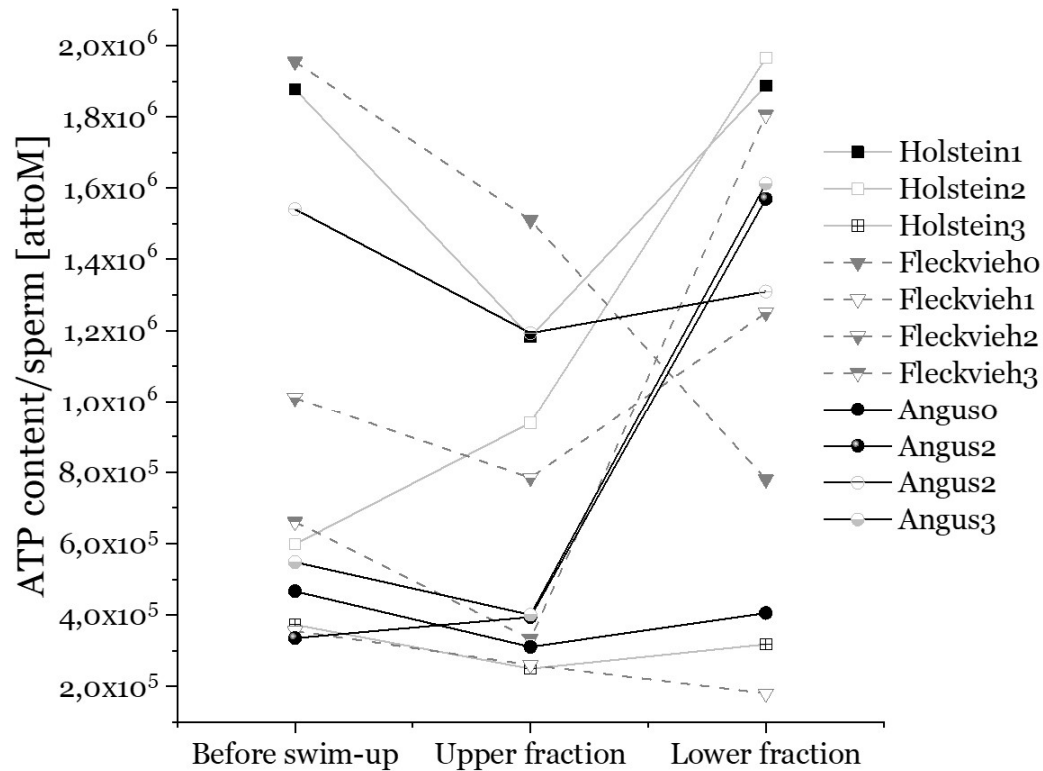

1

2 *Figure 4: Total ATP content per sperm cell of before swim-up fractions, upper and lower swim-up fractions from*  
3 *12 bulls measured with a luminescence-based ATP kit. Each condition was measured three times.*

4

5 Theory suggests that sperm tail length correlates with power output and can thus be considered  
6 a selection parameter for most efficient sperm swimming<sup>35</sup>. Indeed, swim-up selected sperm  
7 with longer flagella in at least one study<sup>21</sup>. In our study (Figure 5) we found in all individuals  
8 that the upper fraction of swim-up sperm contained longer sperm tails compared to the initial  
9 sperm sample ( $p=0.04$ ). The lower fraction consistently contained shorter tailed sperm ( $p=0.05$ ,  
10 Figure 5 and Table 7 in SI).

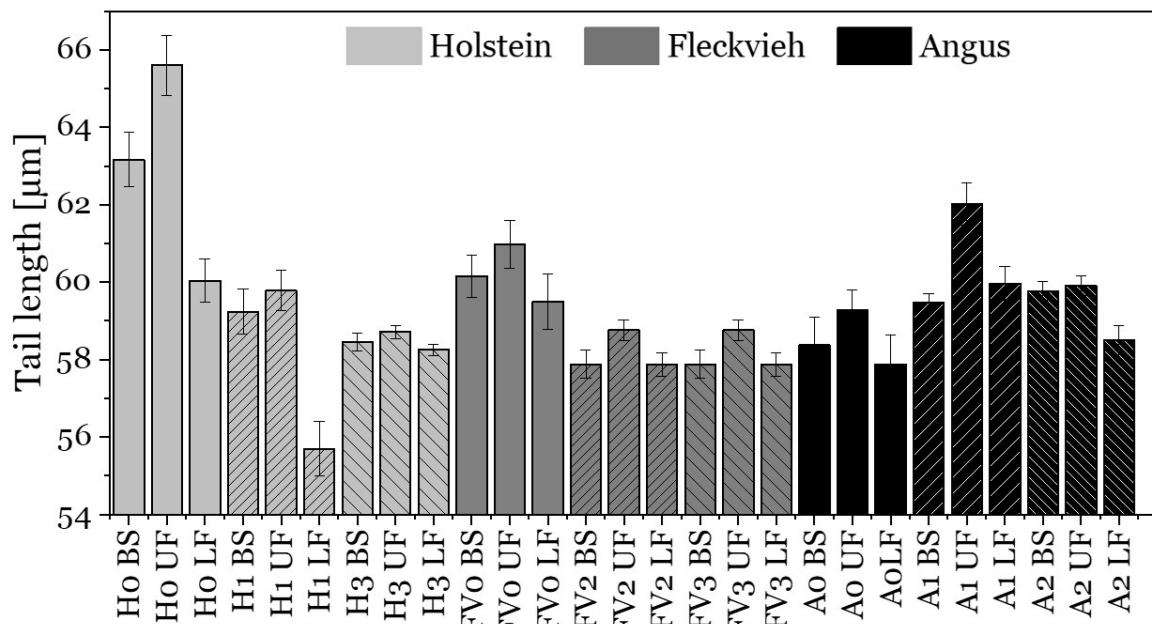

1  
2 *Figure 5: Sperm flagella length of swim-up fractions from 9 bulls of different breeds. 100 sperm cells were*  
3 *measured for each bar. Error bars are standard error of the mean. Upper fractions contain consistently longer*  
4 *sperm tails (estimate= 1.05, p=0.04) compared to the initial sperm sample. The lower fractions contain*  
5 *consistently shorter tails (estimate= -0.98, p=0.05). BS= before swim-up. UF=upper fraction. LF=lower*  
6 *fraction. H0-3= Holstein bulls, FV0-3= Fleckvieh bulls, A0-2= Angus bulls.*

7  
8 **Discussion**

9 This article examines metabolic differences underlying the swim-up method used for sperm  
10 analysis in clinical and veterinary settings. We confirmed for bull that swim-up selects sperm  
11 of higher motility. We additionally reveal that the standard andrological method of swim-up  
12 separates sperm into fractions of high and low metabolic rates and these are based on both,  
13 higher oxygen consumption rates and extracellular acidification rates. We also show that swim-  
14 up separates sperm of high and low ATP production but that upper-fraction sperm cells have  
15 lower ATP content and therefore possibly have higher ATP expenditure. We combined the  
16 swim-up method with subsequently immersing the sperm in high viscosity medium and show  
17 that the level of viscosity does not significantly change their metabolic rates. Finally, we  
18 confirmed a previous notion that because of selecting sperm differing in motility, and as we  
19 show in metabolic rate and ATP production, larger sperm are selected.<sup>21</sup> Overall, this  
20 investigation provides a metabolic explanation of why the swim-up method selects sperm that  
21 seemingly are functionally superior, suggesting that swim-up is useful in animal reproduction  
22 science. It is a possibility that this notion extends to the sperm of other animals and humans.

1 The upper swim-up fractions displayed both highest oxygen consumption rates and highest  
2 extracellular acidification rates. Whether swim-up selects sperm with highest oxygen  
3 consumption rates or the highest extracellular acidification rates remains an open question. Our  
4 results showing that swim-up selects sperm in the upper fraction with highest ATP production  
5 from oxphos may suggest that oxphos plays a key role, but the causal connection between the  
6 two remains open.

7 Our data are consistent with previous studies using different methods in showing a low  
8 glycolytic contribution to bull sperm metabolism<sup>5,8</sup> and we, therefore assume our study to be  
9 representative. Whilst the low glycolytic activity argues for a substantial utilisation of oxphos,  
10 glycolysis is also discussed as being essential to supply energy to sperm regions far from  
11 mitochondria to support motility<sup>7</sup>. For example, inhibiting oxphos while stimulating glycolysis  
12 maintained full sperm motility<sup>36</sup>. Other studies suggest that diffusion of ATP in sperm flagella  
13 is enough, if there is enough ATP stored in the tail, as it is the case in bull sperm<sup>37</sup>. Additionally,  
14 it was observed that sperm cells, especially bovine sperm cells, continue being motile in  
15 medium without glucose for a long time, suggesting that gluconeogenesis might play a role in  
16 energy supply, yet, clear evidence is lacking.<sup>38</sup>

### 17 *Viscosity and its effect on energy expenditure and oxidative damage*

18 Sperm cells in the upper fraction were more likely to penetrate fluids of different levels of  
19 viscosity. This supports the hypothesis from simulation-based studies that suggest that sperm  
20 cells swim more efficiently in highly viscous media by adjusting their flagellar waveform<sup>39</sup>. It  
21 is predicted that, by decreased cell yawing and reduced wavelength, the sperm cell maintains a  
22 similar power output in higher viscosity. The change in flagellar waveform induces a greater  
23 efficacy (velocity per mechanical power) of the sperm motion, thereby reducing the need for  
24 increased energy expenditure. Our study also revealed that increasing the viscosity of the  
25 medium does not improve the separation power of sperm cohorts based on metabolic  
26 differences, because no differences in metabolic rates were observed in these settings. We,  
27 therefore, recommend that higher viscosity should not be used to separate sperm; among others  
28 this is to avoid the possibility of the Brynhild effect<sup>40</sup>. This effect applies if separation or quality  
29 control thresholds for sperm are set too high, in either the female or in artificial settings, sperm  
30 may actually incur reduced functionality or higher energy expenditure and not be useful for  
31 fertilisation. For example, a threshold that requires large energy expenditure may select for  
32 sperm utilising oxphos, which results in 15 times more ATP compared to glycolysis. However,

1 oxphos, responsible for ~90% of a cell's ROS production<sup>41</sup>, may increase ROS damage of cell  
2 membranes and DNA<sup>41</sup> thereby reducing sperm function and obsoleting the threshold<sup>42</sup>. Future  
3 work should test to what extent upper fraction sperm accumulate oxidative damage.

4 Longer migration distances of sperm (e.g. from the anterior vagina in case of natural mating)  
5 were suggested to be one way of quality control for sperm<sup>43</sup>. While it was argued that such long  
6 distances make high metabolic rates beneficial (the winning-the-race argument<sup>43</sup>) it seems that  
7 because sperm are stored by females before fertilisation, low metabolic rates may be beneficial  
8 because ATP would be used up slower and sperm retain motility for longer. It was predicted  
9 that ATP content could be an interesting parameter coupled to fertility and gives supplementary  
10 information about sperm quality.<sup>44</sup> It was reported that ATP content did not necessarily  
11 correlate with motility, but was influenced by preservation method and post-thaw incubation  
12 time. Yet, further research is needed to understand the connection between ATP content and  
13 fertility. In our example, we found that low ATP reserves likely indicated high ATP  
14 expenditure. Combining measures of ATP reserves and ATP production rate might be a useful  
15 prediction parameter for sperm quality.

16 In our study we include 12 bulls from three genetically different breeds. The variation in the  
17 investigated parameters (OCR, ECAR, ATP content, ATP production, tail length) between bulls  
18 was large and therefore prevented an analysis of breed-specific traits. Whilst not the focus of  
19 the work presented here, breed-specific sperm metabolism may an interesting aspect of  
20 predicting fertility.

21 Since the swim-up procedure is a common sperm preparation method and a model to mimic  
22 sperm migration we think it might be reasonable to test the metabolic differences between upper  
23 and lower sperm fractions in human sperm for its potential clinical applicability, especially  
24 given that motility and metabolism are not perfectly correlated. An interesting extension would  
25 be to assess sperm metabolism in patients with low or no sperm motility or abnormal  
26 morphology because these impede the standard motility assays. Further prospects of this  
27 method lies in the assessment of metabolism in real time in sperm exposed to drugs, medium  
28 additives or toxins.

29 In conclusion, we propose that measuring metabolic activity of sperm can be an important  
30 indicator for sperm quality and their migration success.

31

## 1 **Methods**

### 2 *Schematic of workflow*

3 Figure 6 illustrates how the separation and subsequent metabolic measurements of bull sperm  
4 swim-up fractions were performed.

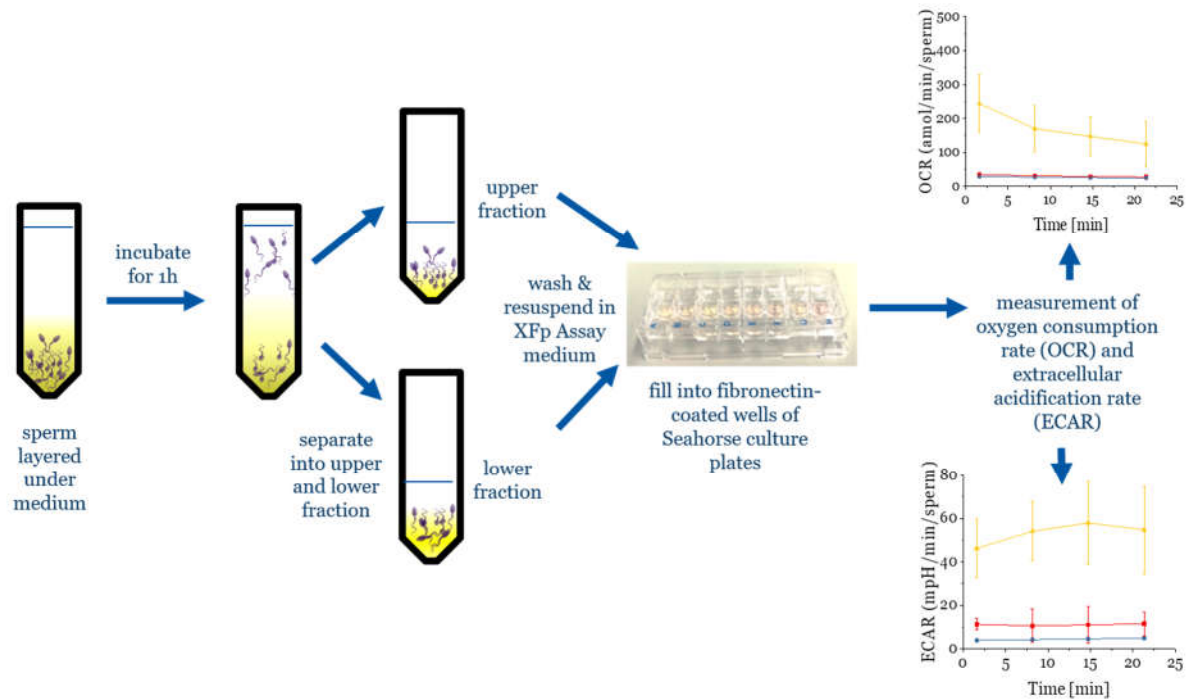

5

6 *Figure 6: Schematic of the workflow for swim-up of bull sperm and subsequent metabolic measurements.*

7

### 8 *Preparation of bovine sperm*

9 Cryopreserved bull semen from 12 bulls from three different breeds (Holstein, Fleckvieh &  
10 Angus) was obtained from Masterrind GmbH. The semen straws were thawed in a 38°C water  
11 bath for 2 minutes and diluted in 1 mL modified Tyrode's medium (SP-TALP). SP-TALP was  
12 made from SP-TL (Caisson labs), 100mM sodium pyruvate (Gibco), 50 mg/mL Gentamicin  
13 (Caisson labs) and 6mg/mL bovine serum albumin (fraction V, Sigma) The vial was centrifuged  
14 at 300g for 5 minutes in soft centrifugation mode. The pellet was resuspended in SP-TALP and  
15 kept in the incubator (37°C) until further use.

### 16 *Swim-up*

1 Swim-up was performed immediately by resuspending the washed sperm pellet in 350 $\mu$ L SP-  
2 TALP. The resuspended sperm were then carefully layered under 1 mL SP-TALP in an  
3 Eppendorf vial. This vial was placed in the incubator for swim-up for 1 h. Subsequently, the  
4 upper 1 mL were withdrawn and placed in a separate vial. Upper and lower fraction of the  
5 swim-up were washed once with SP-TALP at 300g for 5 minutes.

#### 6 *Motility assays*

7 The sperm video recording was performed immediately after swim-up and before the metabolic  
8 measurements. Different sperm fractions were placed on glass slide under the microscope  
9 (Leica DMI inverted microscope) with heating stage with HT50 control unit (Minitübe)  
10 (temperature was set at 38°C). All spermatozoa in observation field (50-300) were recorded for  
11 at least 5 sec with a PCC software and Phantom Highspeed camera at 200 fps, using 10x  
12 objective magnification and phase contrast condenser. Video records were stored in AVI format  
13 prior analyses. Motility analysis was done with the CASA plugin of ImageJ<sup>45</sup> modified  
14 according to Purchase & Earle (2012)<sup>46</sup> delivering overall motility, average path and straight  
15 line velocity (Figure S4).

#### 16 *Seahorse metabolic assays*

17 Metabolic measurements were performed with a Seahorse XFp device from Agilent with eight  
18 well cell culture plates. One day before the assay, the sensors cartridges were hydrated at 37°C  
19 in calibration solution (Agilent). On the day of the assay, each well bottom of the cell culture  
20 plates was coated with 10  $\mu$ L fibronectin (1 mg/mL, Sigma F1141) and incubated until dry to  
21 allow sperm attachment to the well bottoms (Figure S5). The washed sperm pellet was  
22 resuspended in XFp Assay medium (XF Base medium, sodium pyruvate, glutamine, glucose,  
23 pH 7.4, sterile filtered) to obtain a cell concentration of 10<sup>5</sup>-10<sup>6</sup> per well. 50  $\mu$ L of cell  
24 suspension was added to each of six wells (two control wells without cells) and centrifuged for  
25 1 minute at 600 rpm to ensure cell attachment. Assay medium was added to the wells to a total  
26 of 180  $\mu$ L per well. The cell culture plates were kept in the incubator for 10 minutes to  
27 acclimatise. Then, the metabolic measurements with Seahorse (Agilent) were started by  
28 calibrating the sensor cartridge in the calibration solution. After the calibration, the cell culture  
29 plate was inserted. During the Seahorse measurements, the temperature was kept at 37°C and  
30 automatic injections were programmed as desired. Oligomycin A injection was performed in  
31 order to measure the ATP production due to oxphos. Oligomycin A blocks the proton channel



1 of the ATP synthase, an enzyme necessary for oxidative phosphorylation of ADP to ATP<sup>47</sup>.  
2 Thus, the energy production by oxidative phosphorylation is inhibited after injecting  
3 Oligomycin A to the bull sperm fractions in the Seahorse device. 20  $\mu\text{L}$  of 10  $\mu\text{M}$  Oligomycin  
4 A was injected to each well after basal rate measurement, so that a final concentration of 1  $\mu\text{M}$   
5 Oligomycin A was reached in each well. The ATP production due to oxphos can be calculated  
6 by subtracting the OCR rate after injection from the basal OCR rate, as displayed in Figure 3a.  
7 After the metabolic measurements, the viability of cells was checked by viability stain  
8 (Live/Dead Sperm viability kit (ThermoFisher L7011, Figure S5 in supporting information) and  
9 sperm cells from each well were released by vigorous pipetting and counted in a Neubauer  
10 counting chamber in order to normalize the values to sperm numbers.

11 For the investigation of metabolic rates of bull sperm in two different levels of viscosity, swim-  
12 up of bull sperm was performed in sperm medium, as described earlier, then, the different sperm  
13 fractions were subsequently immersed in highly viscous medium (by supplementation of 1%  
14 methyl cellulose). Methyl cellulose is an inert, biocompatible natural polymer that has been  
15 used in various studies to mimic the viscosity of body fluids, also for studying sperm  
16 motion<sup>24,25,31,33,34</sup>. Its viscosity is about 100 times higher than conventional sperm medium (at  
17 low shear rate of  $5 \text{ s}^{-1}$ ), similar to female reproductive tract mucus. Eamer et al. studied sperm  
18 motion in dependence of viscosity of medium by preparing different methyl cellulose solutions.  
19 Their data show that with increasing viscosity, the average sperm velocity decreases while the  
20 sperm linearity increases<sup>33</sup>. Furthermore, Gonzalez-Abreu et al.<sup>25</sup> reveal a beneficial effect of  
21 raising viscosity of the media on the sperm parameters in terms of higher proportion of fast  
22 linear spermatozoa and lower percentage of spermatozoa with slow non-linear movement.

### 23 *Luminescence-based ATP kit*

24 Total ATP content was measured with the luminescence-based ATPlite kit (Perkin Elmer).  
25 First, an ATP standard curve was set up by preparing an ATP dilution series from  $10^{-5} \text{ M}$  ATP  
26 down to blank. The ATP content of sperm was measured by pipetting 100  $\mu\text{L}$  sperm cell  
27 solution into each well of a black 96-well plate, adjusted to  $37^\circ\text{C}$ . 50  $\mu\text{L}$  of lysis solution were  
28 added and the plate was shaken for 5 minutes. 50  $\mu\text{L}$  substrate solution (luciferase/Luciferin)  
29 were added to each well. After shaking for 5 minutes, the plate was dark adapted for 10 minutes  
30 and subsequently luminescence was measured.

## 1 *Statistical treatment of data*

2 Data were analysed using R version 3.5.2 (2018-12-20)<sup>48</sup> and the lme4<sup>49</sup> and glmmADMB  
3 package<sup>50,51</sup>. Generalised linear mixed models (GLMM) with negative binomial fits were  
4 required because of the skewed data distribution. We tested for the effect of viscosity of the  
5 medium (low vs high) and fraction (upper vs lower) on OCR, ECAR and ATP production, and  
6 for the effect of fraction on the ATP content of sperm. We used a binomial GLMM to test for  
7 the effect of fraction and viscosity on the OCR/ECAR ratio. Initial models contained all  
8 possible interaction terms. We reduced the full models stepwise backwards and compared the  
9 final models to their respective null models to select the best model. Please see detailed analysis  
10 in the supporting information.

## 11 *Competing interests*

12 The authors declare no competing interests.

## 13 *Author contributions*

14 VM, CR & BE conducted experiments on metabolism, motility and tail length. SB analyzed  
15 motility data. BE, VM & KR performed statistical analysis. All authors wrote and reviewed the  
16 manuscript.

## 17 *Acknowledgements*

18 We thank Christin Froschauer and Cornelia Thodte for technical support. We thank the  
19 Zukunftskonzept of the TU Dresden, funded under the Excellence Initiative of the German  
20 Science Foundation (DFG). SB thanks funding by “CENAKVA” (LM2018099).

## 21 *References*

- 22 1. Somigliana, E. *et al.* Age-related infertility and unexplained infertility: An intricate  
23 clinical dilemma. *Hum. Reprod.* **31**, 1390–1396 (2016).
- 24 2. Evers, J. L. Female subfertility. *Lancet* **360**, 151–159 (2002).
- 25 3. Huszar, G. *et al.* Fertility testing and ICSI sperm selection by hyaluronic acid binding:  
26 Clinical and genetic aspects. *Reprod. Biomed. Online* **14**, 650–663 (2007).
- 27 4. Organisation, W. H. *WHO laboratory manual for the examination of human semen and*

- 1 *sperm-cervical mucus interaction*. (Cambridge university press, 1999).
- 2 5. Garrett, L. J. A., Revell, S. G. & Leese, H. J. Adenosine triphosphate production by  
3 bovine spermatozoa and its relationship to semen fertilizing ability. *J. Androl.* **29**, 449–  
4 458 (2008).
- 5 6. Tourmente, M., Villar-Moya, P., Rial, E. & Roldan, E. R. S. Differences in ATP  
6 generation via glycolysis and oxidative phosphorylation and relationships with sperm  
7 motility in mouse species. *J. Biol. Chem.* **290**, 20613–20626 (2015).
- 8 7. Mukai, C. & Okuno, M. Glycolysis Plays a Major Role for Adenosine Triphosphate  
9 Supplementation in Mouse Sperm Flagellar Movement. *Biol. Reprod.* **71**, 540–547  
10 (2004).
- 11 8. Storey, B. T. Mammalian sperm metabolism: Oxygen and sugar, friend and foe. *Int. J.*  
12 *Dev. Biol.* **52**, 427–437 (2008).
- 13 9. Nascimento, J. M. *et al.* Comparison of glycolysis and oxidative phosphorylation as  
14 energy sources for mammalian sperm motility, using the combination of fluorescence  
15 imaging, laser tweezers, and real-time automated tracking and trapping. *J. Cell.*  
16 *Physiol.* **217**, 745–751 (2008).
- 17 10. du Plessis, S., Agarwal, A., Mohanty, G. & van der Linde, M. Oxidative  
18 phosphorylation versus glycolysis: what fuel do spermatozoa use? *Asian J. Androl.* **17**,  
19 230 (2015).
- 20 11. Reinhardt, K., Breunig, H. G., Uchugonova, A. & König, K. Sperm metabolism is  
21 altered during storage by female insects: Evidence from two-photon auto-fluorescence  
22 lifetime measurements in bedbugs. *J. R. Soc. Interface* **12**, (2015).
- 23 12. Mahadevan, M. M. & Trounson, A. O. The influence of seminal characteristics on the  
24 success rate of human in vitro fertilization. *Fertil. Steril.* **42**, 400–405 (1984).
- 25 13. Bongso, T. A. *et al.* Effect of sperm motility on human in vitro fertilization. *Syst. Biol.*  
26 *Reprod. Med.* **22**, 185–190 (1989).
- 27 14. Gasparini, C., Simmons, L. W., Beveridge, M. & Evans, J. P. Sperm swimming  
28 velocity predicts competitive fertilization success in the green swordtail *Xiphophorus*  
29 *helleri*. *PLoS One* **5**, 1–5 (2010).
- 30 15. Burness, G., Casselman, S. J., Schulte-Hostedde, A. I., Moyes, C. D. & Montgomerie,  
31 R. Sperm swimming speed and energetics vary with sperm competition risk in bluegill  
32 (*Lepomis macrochirus*). *Behav. Ecol. Sociobiol.* **56**, 65–70 (2004).
- 33 16. WHO. *Examination and processing of human semen*. World Health Organisation

- 1       **Edition V**, (2010).
- 2   17.   Yates, C. A. & De Kretser, D. M. Male-factor infertility and in vitro fertilization. *J.*  
3       *Vitr. Fertil. Embryo Transf.* **4**, 141–147 (1987).
- 4   18.   Davies, N. J. & Cumming, D. C. Sperm Preparation for Intra-uterine Insemination. *J.*  
5       *SOGC* **21**, 1294–1303 (1999).
- 6   19.   Yavetz, H. *et al.* Separation of sperm cells by sedimentation technique is not suitable  
7       for in vitro fertilization purposes. *Andrologia* **28**, 3–6 (2018).
- 8   20.   Esteves, S. C., Sharma, R. K., Thomas, A. J. & Agarwal, A. Improvement in motion  
9       characteristics and acrosome status in cryopreserved human spermatozoa by swim-up  
10      processing before freezing. *Hum. Reprod.* **15**, 2173–2179 (2000).
- 11  21.   Holt, W. V., Hernandez, M., Warrell, L. & Satake, N. The long and the short of sperm  
12      selection in vitro and in vivo: Swim-up techniques select for the longer and faster  
13      swimming mammalian sperm. *J. Evol. Biol.* **23**, 598–608 (2010).
- 14  22.   Parrish, J. J. & Foote, R. H. Quantification of Bovine Sperm Separation by a Swim-up  
15      Method Relationship to Sperm Motility, Integrity of Acrosomes, Sperm Migration in  
16      Polyacrylamide Gel and Fertility. *J. Androl.* **8**, 259–266 (1987).
- 17  23.   Rikmenspoel, R. Movements and active moments of bull sperm flagella as a function  
18      of temperature and viscosity. *J. Exp. Biol.* **108**, 205–230 (1984).
- 19  24.   Kirkman-Brown, J. C. & Smith, D. J. Sperm motility: is viscosity fundamental to  
20      progress? *Mol. Hum. Reprod.* **17**, 539–544 (2011).
- 21  25.   González-Abreu, D., García-Martínez, S., Fernández-Espín, V., Romar, R. & Gadea, J.  
22      Incubation of boar spermatozoa in viscous media by addition of methylcellulose  
23      improves sperm quality and penetration rates during in vitro fertilization.  
24      *Theriogenology* **92**, 14–23 (2017).
- 25  26.   Aitken, R. J. & Baker, M. A. Oxidative stress and male reproductive biology. *Reprod.*  
26      *Fertil. Dev.* **16**, 581–588 (2004).
- 27  27.   Orr, T. J. & Brennan, P. L. R. Sperm storage: Distinguishing selective processes and  
28      evaluating criteria. *Trends Ecol. Evol.* **30**, 261–272 (2015).
- 29  28.   Amir, D. & Schindler, H. The effect of high sperm concentrations on the rates of  
30      respiration and fructolysis by ram spermatozoa. *Reproduction* **13**, 93–99 (1967).
- 31  29.   Zhang, J. *et al.* Measuring energy metabolism in cultured cells, including human  
32      pluripotent stem cells and differentiated cells. *Nat. Protoc.* **7**, 10.1038/nprot.2012.048  
33      (2012).

- 1 30. Lai, S. K. *et al.* Rapid transport of large polymeric nanoparticles in fresh undiluted  
2 human mucus. *Proc. Natl. Acad. Sci. U. S. A.* **104**, 1482–7 (2007).
- 3 31. Hyakutake, T., Suzuki, H. & Yamamoto, S. Effect of non-Newtonian fluid properties  
4 on bovine sperm motility. *J. Biomech.* **48**, 2941–2947 (2015).
- 5 32. Hyakutake, T., Mori, K. & Sato, K. Effects of surrounding fluid on motility of  
6 hyperactivated bovine sperm. *J. Biomech.* **71**, 183–189 (2018).
- 7 33. Eamer, L., Nosrati, R., Vollmer, M., Zini, A. & Sinton, D. Microfluidic assessment of  
8 swimming media for motility-based sperm selection. *Biomicrofluidics* **9**, 44113 (2015).
- 9 34. Ivic, A. *et al.* Critical evaluation of methylcellulose as an alternative medium in sperm  
10 migration tests. *Hum. Reprod.* **17**, 143–149 (2002).
- 11 35. Dresdner, R. D. & Katz, D. F. Relationships of Mammalian Sperm Motility and  
12 Morphology to Hydrodynamic Aspects of Cell Function1. *Biol. Reprod.* **25**, 920–930  
13 (1981).
- 14 36. Losano, J. D. A. *et al.* The stimulated glycolytic pathway is able to maintain ATP  
15 levels and kinetic patterns of bovine epididymal sperm subjected to mitochondrial  
16 uncoupling. *Oxid. Med. Cell. Longev.* **2017**, (2017).
- 17 37. Nevo, A. C. & Rikmenspoel, R. Diffusion of ATP in sperm flagella. *J. Theor. Biol.* **26**,  
18 11–18 (1970).
- 19 38. Ford, W. C. L. Glycolysis and sperm motility: Does a spoonful of sugar help the  
20 flagellum go round? *Hum. Reprod. Update* **12**, 269–274 (2006).
- 21 39. Ishimoto, K., Gadêlha, H., Gaffney, E. A., Smith, D. J. & Kirkman-Brown, J. Human  
22 sperm swimming in a high viscosity mucus analogue. *J. Theor. Biol.* **446**, 1–10 (2018).
- 23 40. Reinhardt, K., Dobler, R. & Abbott, J. An Ecology of Sperm: Sperm Diversification by  
24 Natural Selection. *Annu. Rev. Ecol. Evol. Syst.* **46**, 435–459 (2015).
- 25 41. Balaban, R. S., Nemoto, S. & Finkel, T. Mitochondria, oxidants, and aging. *Cell* **120**,  
26 483–495 (2005).
- 27 42. Tremellen, K. Oxidative stress and male infertility — a clinical perspective. **14**, 243–  
28 258 (2008).
- 29 43. Birkhead, T. R. & Moller, A. P. Sexual selection and the temporal separation of  
30 reproductive events: sperm storage data from reptiles, birds and mammals. *Biol. J.*  
31 *Linn. Soc.* **50**, 295–311 (1993).
- 32 44. Alm-Kristiansen, A. H., Standerholen, F. B., Bai, G., Waterhouse, K. E. &  
33 Kommisrud, E. Relationship between post-thaw adenosine triphosphate content,

- 1 motility and viability in cryopreserved bovine semen applying two different  
2 preservation methods. *Reprod. Domest. Anim.* **53**, 1448–1455 (2018).
- 3 45. Wilson-Leedy, J. G. & Ingermann, R. L. Computer assisted sperm analysis using  
4 ImageJ; description of necessary components and use of free software. 1–7 (2011).
- 5 46. Purchase, C. F. & Earle, P. T. Modifications to the imagej computer assisted sperm  
6 analysis plugin greatly improve efficiency and fundamentally alter the scope of  
7 attainable data. *J. Appl. Ichthyol.* **28**, 1013–1016 (2012).
- 8 47. Huijing, F. & Slater, E. C. The Use of Oligomycin as an Inhibitor of Oxidative  
9 Phosphorylation. *J. Biochem.* **49**, 493–501 (1961).
- 10 48. R version 3.5.2. (2018). Available at: [https://cran.r-](https://cran.r-project.org/bin/windows/base/old/3.5.2/)  
11 [project.org/bin/windows/base/old/3.5.2/](https://cran.r-project.org/bin/windows/base/old/3.5.2/).
- 12 49. Bates, D., Mächler, M., Bolker, B. & Walker, S. Fitting Linear Mixed-Effects Models  
13 Using lme4. *J. Stat. Software; Vol 1, Issue 1* (2015).
- 14 50. Fournier, D. A. *et al.* AD Model Builder: using automatic differentiation for statistical  
15 inference of highly parameterized complex nonlinear models. *Optim. Methods Softw.*  
16 **27**, 233–249 (2012).
- 17 51. Skaug, H., Fournier, D., Nielsen, A., Magnusson, A. & Bolker, B. Generalized linear  
18 mixed models using AD model builder. *R Packag. version 0.7 7*, (2013).

19
